# Supplementary material for: FOLFIRINOX relative dose intensity and disease control in advanced pancreatic adenocarcinoma
Source: PubMed Central journal article supplement — Ther Adv Med Oncol. 2021 Jul 16;13:17588359211029825. doi: 10.1177/17588359211029825 (PMC8287268; doi:10.1177/17588359211029825), 2021-07-16
Supplement: sj-pdf-1-tam-10.1177_17588359211029825.pdf [file sj-pdf-1-tam-10.1177_17588359211029825.pdf]

# APPENDIX

Supplemental Figure S1. Steps derived from the modified Hryniuk model (Lee et al.) for calculation of the cumulative relative dose intensity, for the combination (cmRDI) and for each FOLFIRINOX agent (csRDI).

| Steps for calculating cmRDI                                                                                                                                                                                                                                                                                                                                                                                                                                                                                                                                                                                                                                                                      | Steps for calculating csRDI                                                                                                                                                                                                                                                                                                                                                                                                                                                                                                                              |
|--------------------------------------------------------------------------------------------------------------------------------------------------------------------------------------------------------------------------------------------------------------------------------------------------------------------------------------------------------------------------------------------------------------------------------------------------------------------------------------------------------------------------------------------------------------------------------------------------------------------------------------------------------------------------------------------------|----------------------------------------------------------------------------------------------------------------------------------------------------------------------------------------------------------------------------------------------------------------------------------------------------------------------------------------------------------------------------------------------------------------------------------------------------------------------------------------------------------------------------------------------------------|
| <ul style="list-style-type: none"> <li>Step 1. <math>sRDI = \frac{\text{administered dose of single agent}}{\text{standard dose of single agent}} \times 100</math> (%)</li> <li>Step 2. <math>mRDI = (sRDI_{ox} + sRDI_{ir} + \frac{1 \times sRDI_{fb} + 6 \times sRDI_{fc}}{7}) \times \frac{1}{3}</math> (%)</li> <li>Step 3. Actual cumulative dose = <math>(\sum_{i=1}^{n-1} mRDI_i) + mRDI_n \times \frac{D_n}{14}</math> (%)</li> <li>Step 4. Standard cumulative dose = <math>\frac{\text{end date} - \text{start date}}{14} \times 100</math> (%)</li> <li>Step 5. <math>cmRDI = \frac{\text{actual cumulative dose}}{\text{standard cumulative dose}} \times 100</math> (%)</li> </ul> | <ul style="list-style-type: none"> <li>Step 1. <math>sRDI = \frac{\text{administered dose of single agent}}{\text{standard dose of single agent}} \times 100</math> (%)</li> <li>Step 2. Actual cumulative dose = <math>(\sum_{i=1}^{n-1} sRDI_i) + sRDI_n \times \frac{D_n}{14}</math> (%)</li> <li>Step 3. Standard cumulative dose = <math>\frac{\text{end date} - \text{start date}}{14} \times 100</math> (%)</li> <li>Step 4. <math>csRDI = \frac{\text{actual cumulative dose}}{\text{standard cumulative dose}} \times 100</math> (%)</li> </ul> |

sRDI: single-agent relative dose intensity for a single cycle;

mRDI: multi-drug relative dose intensity for a single cycle;

ox: oxaliplatin; ir: irinotecan; fb: 5-FU bolus; fc: 5-FU continuous infusion;

csRDI: cumulative single-agent relative dose intensity;

cmRDI: cumulative multi-drug relative dose intensity.

n: number of the delivered cycles until the first tumor reassessment.

For the calculation of the actual cumulative dose, the RDI of the last cycle ( $mRDI_n$  or  $sRDI_n$ ) was weighted by the ratio of the time interval  $D_n$  divided by the standard 14-day cycle duration, where  $D_n$  is the time interval from the first day of the last cycle to the first tumor reassessment.

For the calculation of the “standard cumulative dose”, we computed the time interval between the first day of the first cycle (C1J1) denoted “start date” and the date of the first day of the last cycle (CnJ1) plus 14 days (or the date of CT-scan if the tumor reassessment was performed before that date), denoted “end date”.

# Results

Supplemental Figure S2. Patient selection flowchart.

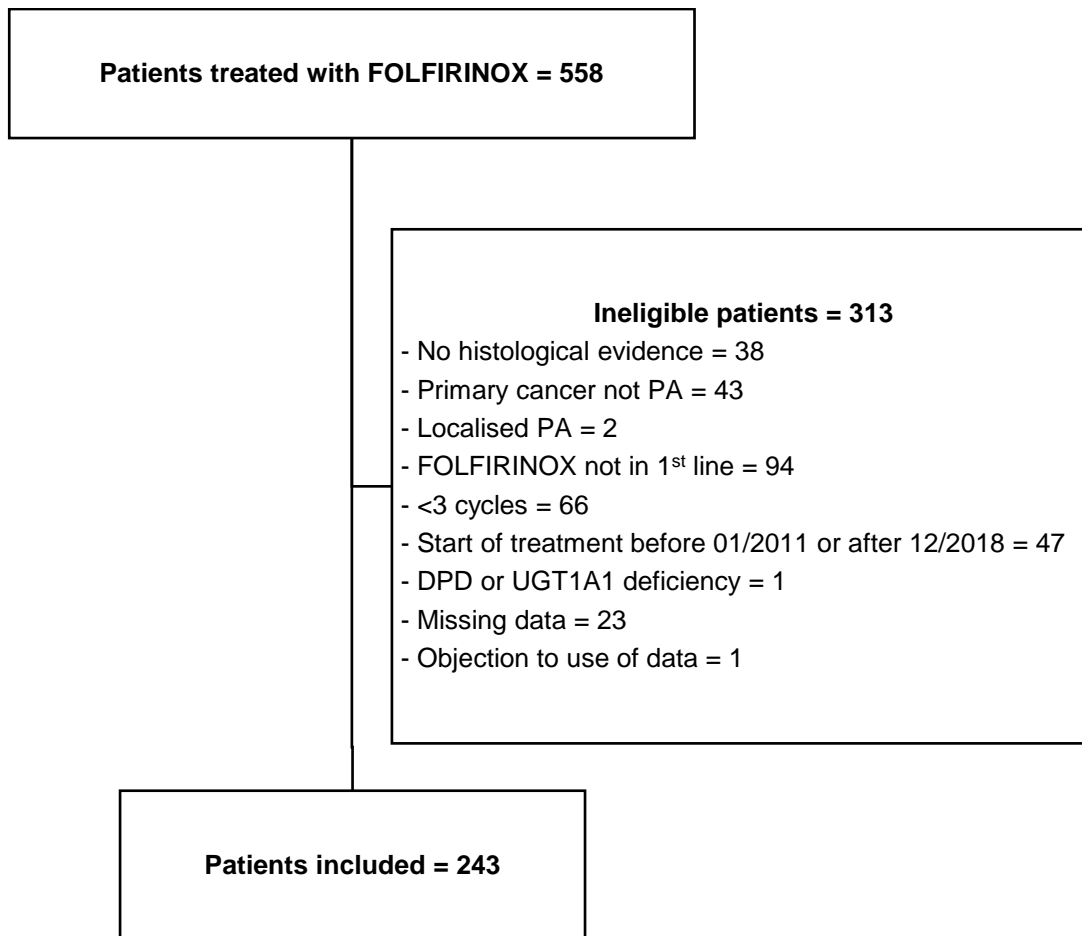

Abbreviations: PA, pancreatic adenocarcinoma; DPD, dihydropyrimidine dehydrogenase; UGT1A1, UDP-glycosyltransferase 1 polypeptide A1

Supplemental Figure S3. Waterfall plot of the depth of tumor response.

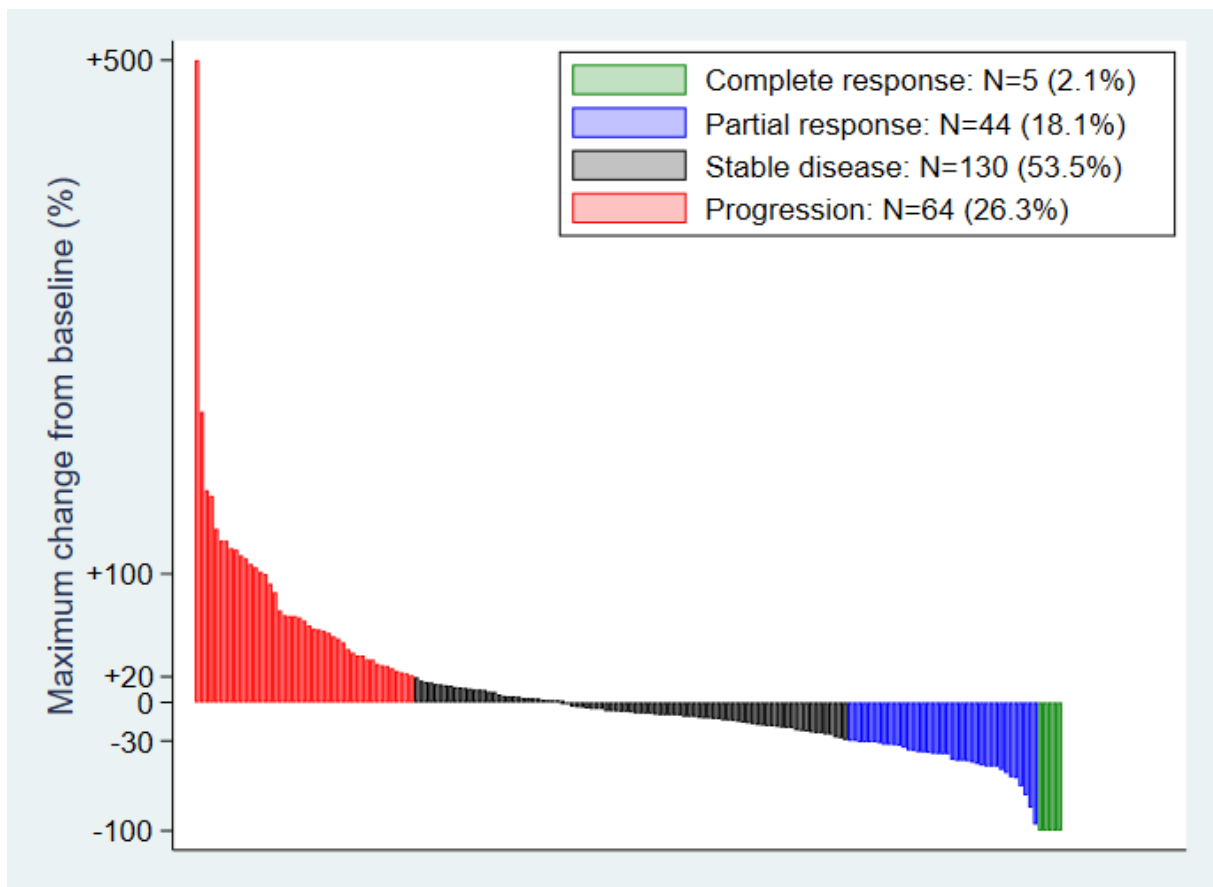

*Supplemental Figure S4.* ROC curve of disease control models. Models included 1) only the clinical characteristics of patients; 2) clinical characteristics and four csRDIs; 3) clinical characteristics and cmRDI; and 4) cmRDI only (univariate analysis). The multivariable models included ECOG performance status, liver metastasis, number of cycles before first assessment, and center,

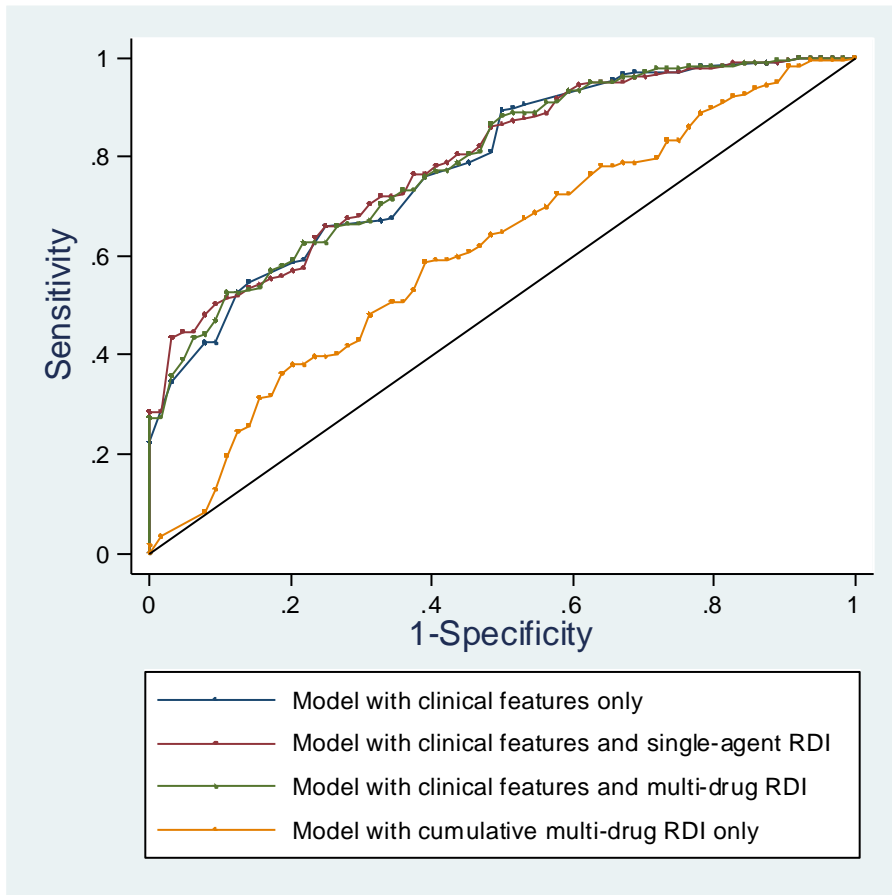

- alone in model 1
- plus the csRDI of the four component agents (oxaliplatin, irinotecan, 5FU bolus, and 5FU continuous infusion) in model 2
- plus the cmRDI in model 3

ROC, receiver operating characteristic; csRDI, cumulative single-agent relative dose intensity; cmRDI, cumulative multi-drug relative dose intensity.

Supplemental Figure S5. ROC curve of objective response. Models including 1) only clinical characteristics of patients, 2) clinical characteristics and four csRDIs, 3) clinical characteristics and cmRDI. The multivariable models include ECOG, liver metastasis, number of cycles before first reassessment and center

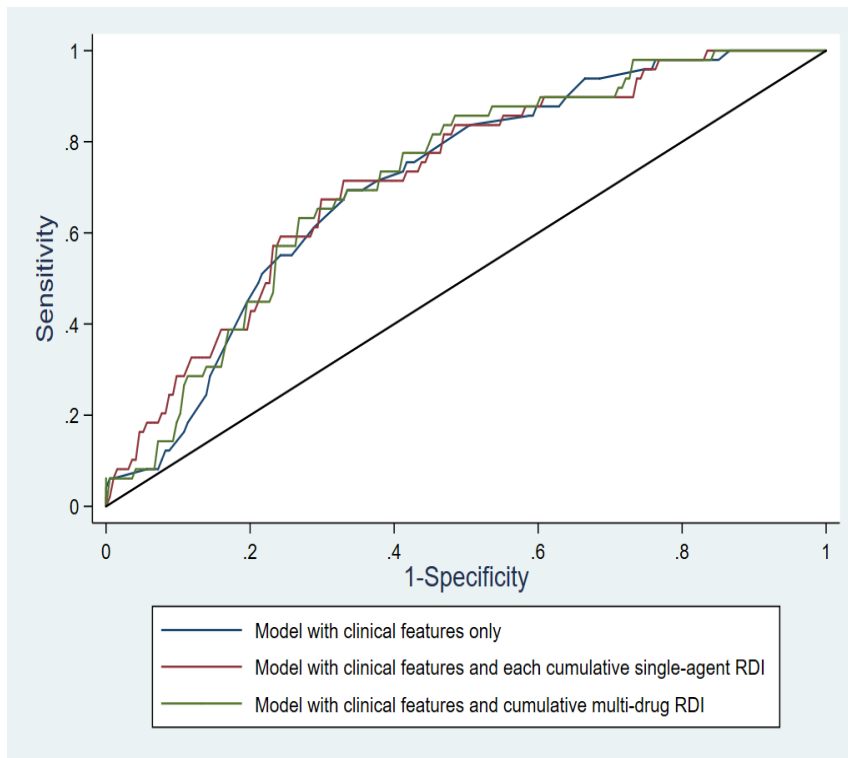

- alone in model 1,
  - plus the csRDI of the four components agents (oxaliplatin, irinotecan, 5FU bolus and 5FU continuous infusion) in model 2
  - plus the cmRDI in model 3
- ROC, receiver operating characteristic; csRDI, cumulative single-agent relative dose intensity; cmRDI, cumulative multi-drug relative dose intensity.*

Supplemental Figure S6. Cumulative probability of occurrence of Grade III/IV toxicity from the date of initiation of treatment with FOLFIRINOX estimated by means of a 1 - Kaplan-Meier curve as a function of time (in days).

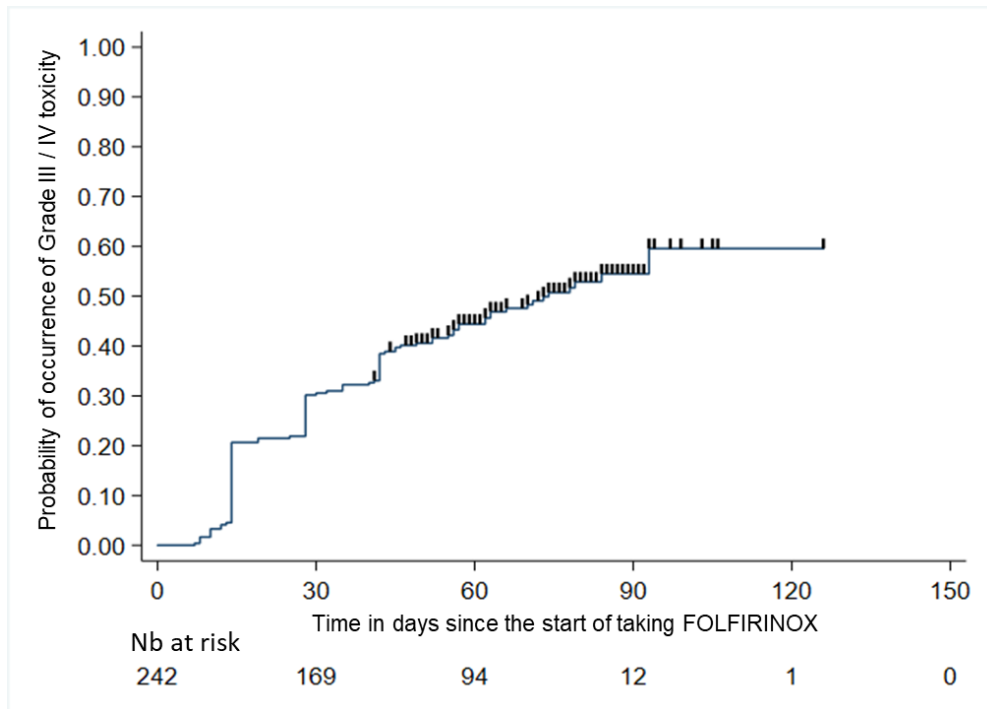

Patients who did not develop toxicity were censored on the date of reassessment. N = 242, because 1 patient in the study did not undergo an imaging reassessment due to clinical progression.

Supplemental Table S1. Cumulative relative dose intensity per agent and overall (N = 243).

| Cumulative relative dose intensity | csRDI Oxaliplatin | csRDI Irinotecan | csRDI 5FU bolus | csRDI 5FU continuous infusion | cmRDI FOLFIRINOX |
|------------------------------------|-------------------|------------------|-----------------|-------------------------------|------------------|
| ≤10%                               | 0 (0.0%)          | 1 (0.4%)         | 15 (6.2%)       | 0 (0.0%)                      | 0 (0.0%)         |
| 10–20%                             | 0 (0.0%)          | 4 (1.2%)         | 13 (5.3%)       | 0 (0.0%)                      | 0 (0.0%)         |
| 20–30%                             | 1 (0.4%)          | 2 (0.8%)         | 9 (3.7%)        | 1 (0.4%)                      | 1 (0.4%)         |
| 30–40%                             | 3 (1.2%)          | 3 (1.2%)         | 6 (2.5%)        | 0 (0.0%)                      | 0 (0.0%)         |
| 40–50%                             | 8 (3.3%)          | 14 (5.8%)        | 13 (5.3%)       | 9 (3.7%)                      | 12 (4.9%)        |
| 50–60%                             | 20 (8.2%)         | 16 (6.6%)        | 17 (7.0%)       | 13 (5.3%)                     | 17 (7.0%)        |
| 60–70%                             | 27 (11.1%)        | 35 (14.4%)       | 28 (11.5%)      | 28 (11.5%)                    | 37 (15.2%)       |
| 70–80%                             | 60 (24.7%)        | 51 (21.0%)       | 37 (15.2%)      | 55 (22.6%)                    | 52 (21.4%)       |
| 80–90%                             | 44 (18.1%)        | 45 (18.5%)       | 34 (14.0%)      | 43 (17.7%)                    | 50 (20.6%)       |
| >90%                               | 80 (32.9%)        | 72 (29.6%)       | 71 (29.2%)      | 94 (38.7%)                    | 74 (30.5%)       |

Abbreviations: csRDI, cumulative single-agent relative dose intensity; cmRDI, cumulative multi-drug relative dose intensity.



Supplemental Table S2. Clinical factors associated with disease control rate in the entire population.

| Characteristics                                       | Complete model (N=203) |                       |                      | Final model (N=243) |                       |                      |
|-------------------------------------------------------|------------------------|-----------------------|----------------------|---------------------|-----------------------|----------------------|
|                                                       | Adjusted OR            | 95% CI<br>adjusted OR | Adjusted p-<br>value | Adjusted OR         | 95% CI<br>adjusted OR | Adjusted p-<br>value |
| <b>ECOG PS</b>                                        |                        |                       | 0.008                |                     |                       | 0.002                |
| 1                                                     | 0.30                   | (0.12–0.73)           |                      | 0.29                | (0.13–0.63)           |                      |
| 0                                                     | 1 (ref)                |                       |                      | 1 (ref)             |                       |                      |
| <b>Hepatic metastasis</b>                             |                        |                       | 0.11                 |                     |                       | 0.004                |
| Yes                                                   | 0.52                   | (0.25–1.15)           |                      | 0.35                | (0.17–0.72)           |                      |
| No                                                    | 1 (ref)                |                       |                      | 1 (ref)             |                       |                      |
| <b>CA19-9 (MD = 40)<br/>before FOLFIRINOX*</b>        |                        |                       | 0.23                 | -                   |                       |                      |
| OR / ln                                               | 0.85                   | (0.65–1.11)           |                      |                     |                       |                      |
| <b>Number of cycles<br/>before first reassessment</b> |                        |                       | <0.0001              |                     |                       | <0.0001              |
| OR / 1 cycle                                          | 2.36                   | (1.52–3.66)           |                      | 2.31                | (1.55–3.47)           |                      |
| <b>Center</b>                                         |                        |                       | 0.01                 |                     |                       | 0.02                 |
| Center 1                                              | 1 (ref)                |                       |                      | 1 (ref)             |                       |                      |
| Center 2                                              | 0.65                   | (0.21–1.97)           |                      | 0.49                | (0.17–1.39)           |                      |
| Center 3                                              | 0.32                   | (0.07–1.50)           |                      | 0.40                | (0.09–1.67)           |                      |
| Center 4                                              | 0.16                   | (0.04–0.64)           |                      | 0.17                | (0.05–0.59)           |                      |
| Center 5                                              | 1.84                   | (0.50–6.84)           |                      | 1.31                | (0.43–4.03)           |                      |
| Center 6                                              | 4.96                   | (0.99–24.6)           |                      | 2.31                | (0.68–7.86)           |                      |

Abbreviations: OR, odds ratio; CI, confidence interval; ECOG, Eastern Cooperative Oncology Group; PS, performance status; CA19-9, carbohydrate antigen 19-9; MD, Missing data.

\*We performed a logarithmic transformation of this variable before studying its relationship with disease control rate due to the very high values obtained in some patients.

Supplemental Table S3. Factors associated with the depth of tumor response in the entire population.

| Depth of tumor response                                     |                        |              |         |
|-------------------------------------------------------------|------------------------|--------------|---------|
| Characteristics                                             | Regression coefficient | 95% CI       | p-value |
| cmRDI of FOLFIRINOX (/10%)                                  | -2.88                  | (-9.2–3.40)  | 0.367   |
| <b>ECOG PS</b>                                              |                        |              | 0.245   |
| 1                                                           | 12.0                   | (-8.3–32.4)  |         |
| 0                                                           | 0 (ref)                |              |         |
| <b>Hepatic metastasis</b>                                   |                        |              | 0.360   |
| Yes                                                         | 9.2                    | (-10.6–28.9) |         |
| No                                                          | 0 (ref)                |              |         |
| <b>Number of cycles before first reassessment / 1 cycle</b> |                        |              | 0.10    |
|                                                             | -10.1                  | (-22.1–1.84) |         |
| <b>Center</b>                                               |                        |              | 0.13    |
| Center 1                                                    | 0 (ref)                |              |         |
| Center 2                                                    | 4.57                   | (-26.6–35.7) |         |
| Center 3                                                    | 42.2                   | (0.02–84.8)  |         |
| Center 4                                                    | 31.7                   | (-7.50–70.9) |         |
| Center 5                                                    | -4.50                  | (-37.3–28.3) |         |
| Center 6                                                    | -14.5                  | (-49.5–20.6) |         |

Abbreviations: CI, confidence interval; cmRDI, cumulative multi-drug relative dose intensity; ECOG, Eastern Cooperative Oncology Group; PS performance status.

The regression coefficients, confidence intervals and p-values were estimated from in the model including cmRDI, ECOG performance status, presence of liver metastasis, number of cycles before first reassessment and center.

Supplemental Table S4. Association between the cumulative relative dose intensity of FOLFIRINOX and progression-free survival in the entire population.

| All patients<br>(N=243)       |              |                     |                   |
|-------------------------------|--------------|---------------------|-------------------|
| Relative dose intensity       | Adjusted HR* | 95% CI adjusted HR* | Adjusted p-value* |
| <b>HR / 10%</b>               |              |                     |                   |
| csRDI oxaliplatin             | 1.06         | (0.85–1.31)         | 0.58              |
| csRDI irinotecan              | 0.98         | (0.86–1.13)         | 0.83              |
| csRDI 5FU bolus               | 1.04         | (0.97–1.11)         | 0.19              |
| csRDI 5FU continuous infusion | 0.93         | (0.72–1.20)         | 0.56              |
| cmRDI of FOLFIRINOX           | 1.02         | (0.93–1.13)         | 0.67              |

Abbreviations: HR, Hazard ratio; CI, confidence interval; csRDI, cumulative single-agent relative dose intensity; cmRDI, cumulative multi-drug relative dose intensity.

\*The hazard-ratios, confidence intervals and p-values were estimated in models adjusted for ECOG performance status, presence of liver metastases, number of cycles before first reassessment and center.

Supplemental Table S5. Association between the cumulative relative dose intensity of FOLFIRINOX and overall survival in the entire population.

| Relative dose intensity       | All patients<br>(N=243) |                     |                   |
|-------------------------------|-------------------------|---------------------|-------------------|
|                               | Adjusted HR*            | 95% CI adjusted HR* | Adjusted p-value* |
| <b>HR / 10%</b>               |                         |                     |                   |
| csRDI oxaliplatin             | 1.02                    | (0.83–1.25)         | 0.83              |
| csRDI irinotecan              | 0.96                    | (0.84–1.08)         | 0.49              |
| csRDI 5FU bolus               | 1.03                    | (0.97–1.10)         | 0.34              |
| csRDI 5FU continuous infusion | 0.99                    | (0.77–1.27)         | 0.95              |
| cmRDI of FOLFIRINOX           | 0.99                    | (0.90–1.11)         | 0.99              |

Abbreviations: HR, Hazard ratio; CI, confidence interval; csRDI, cumulative single-agent relative dose intensity; cmRDI, cumulative multi-drug relative dose intensity.

\*The hazard-ratios, confidence intervals and p-values were estimated in models adjusted for ECOG performance status, presence of liver metastases, number of cycles before first reassessment and center.

Supplemental Table S6. Grade III or IV toxicities occurring with FOLFIRINOX in the entire population (N = 243).

| <b>Characteristics</b>                  | <b>N</b> | <b>%</b> |
|-----------------------------------------|----------|----------|
| <b>Grade III or IV toxicity</b>         |          |          |
| No                                      | 125      | 51.4%    |
| Yes                                     | 118      | 48.6%    |
| <b>Nature of toxicity</b>               |          |          |
| Deterioration in overall health/fatigue | 45       | 18.5%    |
| Neutropenia (febrile or not)            | 61       | 25.1%    |
| Febrile neutropenia                     | 15       | 6.2%     |
| Thrombocytopenia                        | 5        | 2.1%     |
| Anaemia                                 | 5        | 2.1%     |
| Gastrointestinal disorders              | 40       | 16.5%    |
| Mucositis                               | 3        | 1.2%     |
| Peripheral neuropathy                   | 4        | 1.6%     |
| Thrombosis                              | 9        | 3.7%     |
